# Supplementary material for: High expression of ID family and IGJ genes signature as predictor of low induction treatment response and worst survival in adult Hispanic patients with B-acute lymphoblastic leukemia
Source: PubMed Central journal article supplement (PMC4820984; doi:10.1186/s13046-016-0333-z), 2016-04-05
Supplement: 13046_2016_333_MOESM2_ESM.pdf [file 13046_2016_333_MOESM2_ESM.pdf]

| TargetID  | Remision | No Remisic | Diff Pval | Ratio Rm/n |
|-----------|----------|------------|-----------|------------|
| RPS4Y1    | 2112.5   | 75.9       | 0.00000   | 27.84      |
| SLC25A37  | 207.4    | 101.7      | 0.00000   | 2.04       |
| LOC653778 | 616.2    | 282.7      | 0.00000   | 2.18       |
| TNS3      | 681.7    | 274.1      | 0.00000   | 2.49       |
| LOC654103 | 932.2    | 413.9      | 0.00000   | 2.25       |
| ID3       | 546.9    | 3125       | 0.00000   | 0.17       |
| TOR1B     | 263.8    | 152        | 0.00000   | 1.74       |
| LOC729088 | 101.1    | 68.9       | 0.00000   | 1.47       |
| PCCA      | 344.4    | 120.4      | 0.00000   | 2.86       |
| MGC18216  | 228.6    | 113.2      | 0.00000   | 2.02       |
| IQGAP2    | 607.6    | 325.5      | 0.00000   | 1.87       |
| MEX3B     | 413.5    | 132.8      | 0.00000   | 3.11       |
| CD83      | 791.3    | 2198.4     | 0.00000   | 0.36       |
| NELF      | 670.2    | 273.9      | 0.00000   | 2.45       |
| NKD2      | 521.7    | 75.3       | 0.00001   | 6.93       |
| ABCA1     | 1660.9   | 690.7      | 0.00001   | 2.4        |
| RASA2     | 213.1    | 128.3      | 0.00001   | 1.66       |
| LRRC32    | 144.3    | 75         | 0.00001   | 1.92       |
| RDH10     | 113.3    | 67.9       | 0.00001   | 1.67       |
| PRKX      | 312.3    | 155.6      | 0.00003   | 2.01       |
| SLAIN1    | 390.8    | 845.9      | 0.00003   | 0.46       |
| RAB11FIP5 | 90.9     | 213.3      | 0.00003   | 0.43       |
| CCDC24    | 287.4    | 644.4      | 0.00004   | 0.45       |
| PDE3B     | 229.2    | 84.5       | 0.00004   | 2.71       |
| HMGB3     | 162.3    | 82.2       | 0.00005   | 1.97       |
| KCNK3     | 174.7    | 78.4       | 0.00006   | 2.23       |
| C6ORF192  | 260.2    | 140.1      | 0.00008   | 1.86       |
| RNASE6    | 191.5    | 77.6       | 0.00009   | 2.47       |
| CEBPB     | 1396.8   | 338.1      | 0.00011   | 4.13       |
| TMEM181   | 537.1    | 270.3      | 0.00012   | 1.99       |
| MYC       | 1396.2   | 674.3      | 0.00012   | 2.07       |
| PTTG1IP   | 1948.4   | 1132.6     | 0.00013   | 1.72       |
| CMTM8     | 1480.9   | 4601.8     | 0.00018   | 0.32       |
| FAM7A1    | 68.2     | 109.1      | 0.00018   | 0.63       |
| TM9SF3    | 719.7    | 425.9      | 0.00019   | 1.69       |
| AGPAT5    | 193.8    | 113.3      | 0.00020   | 1.71       |
| CD99      | 1017.4   | 2275.9     | 0.00020   | 0.45       |
| KIF20B    | 373.2    | 232.8      | 0.00020   | 1.6        |
| ID1       | 80.2     | 310.4      | 0.00021   | 0.26       |
| RASD1     | 3720.8   | 1755.8     | 0.00022   | 2.12       |
| HS.497591 | 185.3    | 98.1       | 0.00025   | 1.89       |
| HDAC4     | 187.5    | 118.4      | 0.00028   | 1.58       |
| HS.412918 | 162.6    | 108.3      | 0.00029   | 1.5        |
| LRFN3     | 141.4    | 68.6       | 0.00029   | 2.06       |
| MYO10     | 266.4    | 81.4       | 0.00029   | 3.27       |
| LHFP      | 229      | 135.6      | 0.00030   | 1.69       |

|              |        |        |         |      |
|--------------|--------|--------|---------|------|
| C13ORF27     | 536.1  | 225.7  | 0.00030 | 2.37 |
| LOC648399    | 186.1  | 107.9  | 0.00031 | 1.72 |
| RPL23AP53    | 320.6  | 163.5  | 0.00031 | 1.96 |
| NFKBIE       | 279    | 597.4  | 0.00032 | 0.47 |
| AURKA        | 189.7  | 91.1   | 0.00034 | 2.08 |
| CREG1        | 1027.1 | 451.5  | 0.00035 | 2.27 |
| OAT          | 400    | 225.7  | 0.00036 | 1.77 |
| SETD6        | 227.6  | 126.4  | 0.00036 | 1.8  |
| SIPA1L2      | 872.4  | 377.3  | 0.00036 | 2.31 |
| CCT5         | 168.1  | 114.8  | 0.00036 | 1.46 |
| LOC644128    | 354.1  | 188.2  | 0.00036 | 1.88 |
| FAM108C1     | 993.8  | 445.2  | 0.00038 | 2.23 |
| HS.444291    | 77.2   | 132.3  | 0.00038 | 0.58 |
| LANCL2       | 185.5  | 121.1  | 0.00038 | 1.53 |
| WFS1         | 1591.7 | 594.4  | 0.00039 | 2.68 |
| MOSPD1       | 138    | 97.8   | 0.00040 | 1.41 |
| ITPRIPL2     | 518.7  | 179.4  | 0.00043 | 2.89 |
| UCK2         | 215.6  | 120    | 0.00043 | 1.8  |
| LAMC1        | 687.9  | 367.2  | 0.00045 | 1.87 |
| ZEB2         | 1130.6 | 683.4  | 0.00047 | 1.65 |
| SUCLA2       | 389.1  | 239.6  | 0.00051 | 1.62 |
| LOC730256    | 95.8   | 149.2  | 0.00057 | 0.64 |
| H1FX         | 478.5  | 897.8  | 0.00065 | 0.53 |
| C14ORF4      | 1018.6 | 1990.3 | 0.00067 | 0.51 |
| EHBP1        | 494.8  | 268.6  | 0.00070 | 1.84 |
| C9ORF21      | 205.4  | 95     | 0.00078 | 2.16 |
| APLP2        | 125.9  | 85.2   | 0.00080 | 1.48 |
| AMN1         | 143.8  | 102.4  | 0.00082 | 1.41 |
| CCNJ         | 206.3  | 93     | 0.00086 | 2.22 |
| PRIC285      | 319.2  | 191.1  | 0.00086 | 1.67 |
| JUN          | 4038.1 | 7769.9 | 0.00088 | 0.52 |
| QSOX2        | 928.2  | 505    | 0.00090 | 1.84 |
| CTR9         | 295    | 169.5  | 0.00098 | 1.74 |
| IL17RA       | 220.6  | 109.9  | 0.00099 | 2.01 |
| RHOBTB3      | 211.5  | 93.5   | 0.00105 | 2.26 |
| NT5C3        | 997.6  | 630.4  | 0.00116 | 1.58 |
| FAM43A       | 374.7  | 175.6  | 0.00122 | 2.13 |
| CALU         | 200.2  | 132.4  | 0.00128 | 1.51 |
| FAM64A       | 127.6  | 79.3   | 0.00133 | 1.61 |
| SLC1A3       | 114.3  | 70.1   | 0.00137 | 1.63 |
| LOC100129668 | 139.1  | 225.4  | 0.00145 | 0.62 |
| BRWD3        | 181.6  | 110.5  | 0.00149 | 1.64 |
| NOP16        | 180.1  | 126.3  | 0.00167 | 1.43 |
| EPDR1        | 557    | 233.1  | 0.00169 | 2.39 |
| RIPK2        | 997.8  | 2064.2 | 0.00170 | 0.48 |
| POLR3B       | 400    | 262.1  | 0.00179 | 1.53 |
| LOC100133760 | 310.6  | 200.7  | 0.00187 | 1.55 |

|           |        |         |         |      |
|-----------|--------|---------|---------|------|
| OPN3      | 148.7  | 101.3   | 0.00194 | 1.47 |
| ORMDL3    | 195.9  | 385.2   | 0.00194 | 0.51 |
| MGST3     | 562.6  | 346.4   | 0.00198 | 1.62 |
| TBL1X     | 262.6  | 143     | 0.00198 | 1.84 |
| WBP5      | 262.1  | 75.7    | 0.00209 | 3.46 |
| C14ORF181 | 210.8  | 391.5   | 0.00216 | 0.54 |
| TBCD      | 265.9  | 554.3   | 0.00217 | 0.48 |
| TARS2     | 172    | 122.1   | 0.00223 | 1.41 |
| TYROBP    | 267    | 109.4   | 0.00223 | 2.44 |
| C5        | 332.2  | 603.3   | 0.00226 | 0.55 |
| HS.409512 | 145.8  | 89.5    | 0.00233 | 1.63 |
| SEC23B    | 586.3  | 381.8   | 0.00263 | 1.54 |
| MT1F      | 325.8  | 135.3   | 0.00266 | 2.41 |
| XIST      | 987.4  | 2063.2  | 0.00273 | 0.48 |
| IL3RA     | 295.9  | 136.7   | 0.00281 | 2.17 |
| ESAM      | 347.7  | 98.7    | 0.00284 | 3.52 |
| PIM2      | 371    | 656.3   | 0.00285 | 0.57 |
| DKC1      | 2299.1 | 1449.8  | 0.00292 | 1.59 |
| HSPC111   | 322.4  | 217.1   | 0.00293 | 1.49 |
| HS.579530 | 488.1  | 1150    | 0.00301 | 0.42 |
| SNORD56   | 249.6  | 151.2   | 0.00333 | 1.65 |
| ZCCHC6    | 220.4  | 139.7   | 0.00345 | 1.58 |
| GIMAP4    | 1320.5 | 681.6   | 0.00345 | 1.94 |
| PTGER4    | 1726   | 4147    | 0.00347 | 0.42 |
| KIAA0427  | 131.1  | 93.1    | 0.00372 | 1.41 |
| EPB41L2   | 191    | 113.4   | 0.00376 | 1.68 |
| UTRN      | 143.6  | 103.5   | 0.00385 | 1.39 |
| CHST7     | 372.9  | 124.3   | 0.00389 | 3    |
| TAF5      | 243.6  | 160.9   | 0.00395 | 1.51 |
| WDR49     | 190.2  | 310.7   | 0.00405 | 0.61 |
| MS4A6A    | 292.5  | 95.7    | 0.00411 | 3.06 |
| MED11     | 123.2  | 92.4    | 0.00414 | 1.33 |
| NFKBIA    | 6312.6 | 11244.7 | 0.00414 | 0.56 |
| LOC654260 | 138.7  | 234.2   | 0.00418 | 0.59 |
| EMP3      | 361.8  | 622.9   | 0.00420 | 0.58 |
| DHX33     | 217.7  | 152.9   | 0.00422 | 1.42 |
| RHOB      | 929.5  | 2628.7  | 0.00429 | 0.35 |
| HS.66187  | 284.3  | 93.4    | 0.00446 | 3.04 |
| LY6E      | 449.7  | 295.4   | 0.00446 | 1.52 |
| DEPDC6    | 87.7   | 66.6    | 0.00455 | 1.32 |
| HBEGF     | 1899.1 | 1025.5  | 0.00460 | 1.85 |
| CCDC99    | 292.9  | 191.2   | 0.00469 | 1.53 |
| MT1A      | 683.7  | 322     | 0.00469 | 2.12 |
| SNORA61   | 528.7  | 337.6   | 0.00483 | 1.57 |
| B4GALT5   | 230    | 106.7   | 0.00493 | 2.15 |
| RAB20     | 109    | 73.9    | 0.00502 | 1.47 |
| TSR1      | 137.2  | 100.7   | 0.00510 | 1.36 |

|              |        |        |         |      |
|--------------|--------|--------|---------|------|
| PLAU         | 126    | 387.1  | 0.00514 | 0.33 |
| LOC727820    | 307.1  | 567.1  | 0.00522 | 0.54 |
| C10ORF50     | 95.9   | 159.3  | 0.00523 | 0.6  |
| C5ORF33      | 232.9  | 158.3  | 0.00523 | 1.47 |
| LOC652771    | 121.9  | 85.3   | 0.00532 | 1.43 |
| KIAA1279     | 180    | 123.8  | 0.00543 | 1.45 |
| MTE          | 122    | 72.5   | 0.00543 | 1.68 |
| TICAM1       | 250    | 449.7  | 0.00558 | 0.56 |
| IL10RA       | 129.8  | 234.7  | 0.00574 | 0.55 |
| FKBP1A       | 433.6  | 284.2  | 0.00576 | 1.53 |
| LOC729680    | 110.4  | 76.6   | 0.00581 | 1.44 |
| LOC646993    | 158.4  | 85.7   | 0.00603 | 1.85 |
| PGM2         | 279.9  | 184.7  | 0.00603 | 1.52 |
| LOC100128899 | 89.9   | 67.9   | 0.00603 | 1.32 |
| DDN          | 124.9  | 81.4   | 0.00628 | 1.53 |
| ETS1         | 1338.5 | 683.3  | 0.00640 | 1.96 |
| PRRC1        | 551.5  | 364.9  | 0.00645 | 1.51 |
| ARL9         | 154.4  | 257.9  | 0.00659 | 0.6  |
| LOC100188949 | 666.9  | 1669.6 | 0.00659 | 0.4  |
| ZHX2         | 1116.3 | 711.9  | 0.00686 | 1.57 |
| EFHC2        | 139.2  | 70.8   | 0.00712 | 1.97 |
| TMEM2        | 580.1  | 295    | 0.00714 | 1.97 |
| ZNF185       | 395.9  | 200    | 0.00726 | 1.98 |
| G3BP1        | 355.5  | 214.1  | 0.00727 | 1.66 |
| WARS2        | 101.3  | 75.5   | 0.00728 | 1.34 |
| KANK2        | 223.8  | 123.8  | 0.00734 | 1.81 |
| TIFA         | 187.6  | 381    | 0.00734 | 0.49 |
| HK2          | 641.4  | 305    | 0.00736 | 2.1  |
| TTC39C       | 227    | 361.1  | 0.00744 | 0.63 |
| TCF7L2       | 192.2  | 112.9  | 0.00751 | 1.7  |
| TGFBR3       | 171.9  | 95.7   | 0.00752 | 1.8  |
| PFAS         | 884    | 585.5  | 0.00758 | 1.51 |
| BIVM         | 141    | 64.7   | 0.00769 | 2.18 |
| LOC729708    | 1307.8 | 807.8  | 0.00780 | 1.62 |
| CDC2         | 150.8  | 94.5   | 0.00781 | 1.59 |
| C11ORF82     | 205.3  | 135.9  | 0.00785 | 1.51 |
| BNIP3        | 638.8  | 336.9  | 0.00786 | 1.9  |
| CHERP        | 245.3  | 163.5  | 0.00791 | 1.5  |
| NT5E         | 804.1  | 1705.5 | 0.00794 | 0.47 |
| SDCBP        | 475.5  | 324    | 0.00801 | 1.47 |
| SEH1L        | 249.1  | 173    | 0.00807 | 1.44 |
| CBLN3        | 171.7  | 308.1  | 0.00809 | 0.56 |
| TPBG         | 195.6  | 80.9   | 0.00825 | 2.42 |
| GCNT1        | 305.9  | 159.2  | 0.00850 | 1.92 |
| HDGFRP3      | 264.9  | 92.6   | 0.00851 | 2.86 |
| FAM65B       | 1113.4 | 2028.9 | 0.00852 | 0.55 |
| MAP2K4       | 265.8  | 175.9  | 0.00853 | 1.51 |

|           |        |        |         |      |
|-----------|--------|--------|---------|------|
| DENND3    | 1053.3 | 1849.2 | 0.00871 | 0.57 |
| IQCG      | 134.2  | 199.6  | 0.00886 | 0.67 |
| DYNLL2    | 561.7  | 1233.2 | 0.00908 | 0.46 |
| NEXN      | 308.8  | 191.5  | 0.00926 | 1.61 |
| TRNT1     | 177.1  | 131.9  | 0.00942 | 1.34 |
| C18ORF19  | 230.2  | 114.1  | 0.00947 | 2.02 |
| LEPROTL1  | 517.8  | 332.7  | 0.00967 | 1.56 |
| GADD45A   | 1034.4 | 561.8  | 0.00968 | 1.84 |
| MTHFD2L   | 229.2  | 146.5  | 0.01027 | 1.56 |
| FUCA1     | 595.9  | 365.1  | 0.01030 | 1.63 |
| TFAP4     | 166.1  | 119.6  | 0.01048 | 1.39 |
| IGJ       | 1108.1 | 5970.9 | 0.01060 | 0.19 |
| FAM44A    | 107.8  | 77.6   | 0.01075 | 1.39 |
| SLC39A14  | 117.3  | 79.8   | 0.01075 | 1.47 |
| HS.104091 | 72.7   | 96.2   | 0.01084 | 0.76 |
| MAP3K5    | 254.4  | 176.5  | 0.01088 | 1.44 |
| SIRT1     | 1029.3 | 664.8  | 0.01105 | 1.55 |
| MOBK11A   | 306.3  | 186.4  | 0.01106 | 1.64 |
| CECR6     | 177    | 81.7   | 0.01124 | 2.17 |
| ACSL1     | 844.3  | 372.6  | 0.01130 | 2.27 |
| BSPRY     | 169.8  | 266.2  | 0.01130 | 0.64 |
| HS.60257  | 227.2  | 119.2  | 0.01130 | 1.91 |
| KLF11     | 329.4  | 797    | 0.01148 | 0.41 |
| STAMBPL1  | 364.4  | 627.9  | 0.01148 | 0.58 |
| FAM101B   | 112.2  | 79.9   | 0.01151 | 1.4  |
| NPHP4     | 171.5  | 102.4  | 0.01159 | 1.67 |
| RNMT      | 560.8  | 334.3  | 0.01162 | 1.68 |
| IER3IP1   | 532.7  | 364.1  | 0.01164 | 1.46 |
| ALG3      | 174.6  | 143.4  | 0.01173 | 1.22 |
| HS.532698 | 297.3  | 184.3  | 0.01174 | 1.61 |
| GFI1      | 380.5  | 921.4  | 0.01175 | 0.41 |
| ZFPM1     | 99.4   | 75.1   | 0.01210 | 1.32 |
| KLRF1     | 111.3  | 74.5   | 0.01227 | 1.49 |
| MIR155HG  | 482.9  | 944.9  | 0.01255 | 0.51 |
| GTF3A     | 3670.1 | 6112.8 | 0.01287 | 0.6  |
| RGPD2     | 108.3  | 69     | 0.01317 | 1.57 |
| TNFSF13B  | 209.3  | 144.7  | 0.01374 | 1.45 |
| FRAT2     | 656.9  | 443.9  | 0.01417 | 1.48 |
| PRDX3     | 870.8  | 583.1  | 0.01420 | 1.49 |
| LOC401623 | 131.9  | 100    | 0.01478 | 1.32 |
| LOC93622  | 278.3  | 192.5  | 0.01488 | 1.45 |
| EAF2      | 678.4  | 1096.4 | 0.01524 | 0.62 |
| GLDC      | 538.5  | 141.6  | 0.01544 | 3.8  |
| RGPD8     | 169.2  | 107.8  | 0.01567 | 1.57 |
| RGS18     | 417.5  | 74.3   | 0.01567 | 5.62 |
| KIF11     | 306.3  | 173.6  | 0.01571 | 1.76 |
| SV2A      | 126.2  | 189.9  | 0.01582 | 0.66 |

|           |        |        |         |      |
|-----------|--------|--------|---------|------|
| IER5      | 823.1  | 1357.8 | 0.01585 | 0.61 |
| RSPH3     | 215.3  | 328.8  | 0.01585 | 0.65 |
| GCET2     | 132.3  | 218.7  | 0.01589 | 0.6  |
| CHST2     | 179.2  | 73.8   | 0.01601 | 2.43 |
| DLAT      | 328.3  | 232.1  | 0.01601 | 1.41 |
| SUSD2     | 82.9   | 113.8  | 0.01601 | 0.73 |
| QDPR      | 461.8  | 318.9  | 0.01617 | 1.45 |
| LOC90925  | 1580.5 | 657.4  | 0.01621 | 2.4  |
| DNASE2    | 217    | 504.3  | 0.01629 | 0.43 |
| GCLM      | 178.6  | 152.3  | 0.01639 | 1.17 |
| CUGBP1    | 97.4   | 77.3   | 0.01645 | 1.26 |
| DLL1      | 1477.4 | 329.1  | 0.01650 | 4.49 |
| LCN2      | 126.6  | 74     | 0.01650 | 1.71 |
| ZNF792    | 415.6  | 261.8  | 0.01656 | 1.59 |
| CORO1C    | 209.3  | 106    | 0.01676 | 1.97 |
| LOC730525 | 318.3  | 180.9  | 0.01678 | 1.76 |
| OAF       | 167.7  | 124.6  | 0.01678 | 1.35 |
| EMILIN2   | 715.1  | 367.3  | 0.01722 | 1.95 |
| RRM2      | 101.2  | 74.5   | 0.01722 | 1.36 |
| LOC441150 | 116.5  | 164.8  | 0.01730 | 0.71 |
| ZNF721    | 623.4  | 429.8  | 0.01772 | 1.45 |
| PGRMC1    | 531.6  | 368.7  | 0.01775 | 1.44 |
| TSHZ1     | 302.3  | 196.7  | 0.01775 | 1.54 |
| CLASP2    | 184.2  | 134.4  | 0.01800 | 1.37 |
| FBXO34    | 598.4  | 370.8  | 0.01809 | 1.61 |
| C19ORF42  | 263    | 189.6  | 0.01842 | 1.39 |
| FABP5L2   | 1115.5 | 742.4  | 0.01843 | 1.5  |
| CD93      | 256    | 145.6  | 0.01868 | 1.76 |
| CD40      | 78.2   | 132.2  | 0.01879 | 0.59 |
| NCOR1     | 141.6  | 106.8  | 0.01951 | 1.33 |
| MRPL19    | 302.2  | 216.3  | 0.01964 | 1.4  |
| LOC727935 | 84.9   | 117.5  | 0.02028 | 0.72 |
| FAM100B   | 585.9  | 996    | 0.02029 | 0.59 |
| RNF141    | 177.5  | 131    | 0.02034 | 1.35 |
| CBR1      | 103.3  | 73.4   | 0.02034 | 1.41 |
| CD27      | 352.2  | 805.7  | 0.02034 | 0.44 |
| TOP2A     | 628.5  | 275.1  | 0.02122 | 2.28 |
| LRRC58    | 287.3  | 206.4  | 0.02127 | 1.39 |
| MS4A1     | 140.2  | 249.1  | 0.02133 | 0.56 |
| ICAM3     | 921.1  | 1533.4 | 0.02144 | 0.6  |
| HS.493947 | 212.9  | 78.9   | 0.02146 | 2.7  |
| SPAG5     | 88.7   | 68.8   | 0.02185 | 1.29 |
| APAF1     | 578.8  | 355.9  | 0.02212 | 1.63 |
| CEACAM6   | 1031.7 | 195.1  | 0.02279 | 5.29 |
| ID2       | 2084.7 | 4209.5 | 0.02314 | 0.5  |
| C5ORF30   | 204    | 139    | 0.02316 | 1.47 |
| PPM2C     | 203.4  | 147.6  | 0.02336 | 1.38 |

|              |        |        |         |      |
|--------------|--------|--------|---------|------|
| LRRC28       | 232.8  | 149.2  | 0.02376 | 1.56 |
| ITGB7        | 381.2  | 757.9  | 0.02398 | 0.5  |
| PPAT         | 330.2  | 236.5  | 0.02406 | 1.4  |
| IRF1         | 1574.8 | 2592.3 | 0.02507 | 0.61 |
| LOC650919    | 191.5  | 348.7  | 0.02507 | 0.55 |
| GTF2IP1      | 623.1  | 418.3  | 0.02512 | 1.49 |
| NGFRAP1      | 206.5  | 79.6   | 0.02535 | 2.59 |
| DHRS3        | 949.8  | 1524   | 0.02537 | 0.62 |
| AHI1         | 288.4  | 122.3  | 0.02538 | 2.36 |
| 3-Mar        | 255.9  | 177.4  | 0.02563 | 1.44 |
| ASF1B        | 112.4  | 74     | 0.02569 | 1.52 |
| UBXN8        | 90.2   | 70.7   | 0.02569 | 1.27 |
| RGS16        | 621.9  | 192.5  | 0.02592 | 3.23 |
| NDRG1        | 837.1  | 525.7  | 0.02607 | 1.59 |
| SOX8         | 108.8  | 68.8   | 0.02620 | 1.58 |
| KCNK6        | 134.7  | 94.7   | 0.02620 | 1.42 |
| PGBD4        | 92.4   | 72.9   | 0.02668 | 1.27 |
| PIGM         | 248.9  | 167.4  | 0.02671 | 1.49 |
| PUS7         | 405.5  | 282.9  | 0.02695 | 1.43 |
| LOC100133077 | 104.9  | 72.4   | 0.02697 | 1.45 |
| UAP1         | 318.9  | 208.4  | 0.02712 | 1.53 |
| PLAGL1       | 111.8  | 76.7   | 0.02719 | 1.46 |
| PRR7         | 142.4  | 254.4  | 0.02725 | 0.56 |
| SMAD7        | 460.4  | 814.3  | 0.02734 | 0.57 |
| CALD1        | 128.7  | 71.7   | 0.02738 | 1.79 |
| COMMD10      | 331.2  | 233.9  | 0.02744 | 1.42 |
| LOC643985    | 127.1  | 85.6   | 0.02751 | 1.48 |
| CAV1         | 133.5  | 78.5   | 0.02756 | 1.7  |
| LOC731314    | 652.6  | 429.3  | 0.02794 | 1.52 |
| ZSCAN5A      | 112.8  | 85.6   | 0.02794 | 1.32 |
| C6ORF203     | 151.1  | 115.7  | 0.02799 | 1.31 |
| BAHCC1       | 133.2  | 91.8   | 0.02823 | 1.45 |
| GOLGA4       | 208.9  | 153.5  | 0.02857 | 1.36 |
| PAPD5        | 534.9  | 345.6  | 0.02857 | 1.55 |
| ZC3H18       | 349    | 250.6  | 0.02857 | 1.39 |
| ADIPOR2      | 845    | 581.3  | 0.02885 | 1.45 |
| GTF2H2       | 128    | 90.1   | 0.02901 | 1.42 |
| FOXH1        | 89.7   | 70.3   | 0.02958 | 1.28 |
| RYBP         | 1172.4 | 641    | 0.02958 | 1.83 |
| SPTLC2       | 156.9  | 110.9  | 0.02958 | 1.42 |
| DAPP1        | 4247.3 | 4549.7 | 0.02964 | 0.93 |
| BCL3         | 338.4  | 538.1  | 0.02970 | 0.63 |
| PAK1         | 315.1  | 494.4  | 0.02982 | 0.64 |
| CSF1R        | 651.8  | 307.3  | 0.02990 | 2.12 |
| LOC387882    | 562.3  | 370.9  | 0.02997 | 1.52 |
| MT2A         | 227.8  | 129.4  | 0.03009 | 1.76 |
| KIAA1430     | 133.9  | 104    | 0.03030 | 1.29 |

|           |        |        |         |      |
|-----------|--------|--------|---------|------|
| CENPE     | 146.7  | 104.5  | 0.03034 | 1.4  |
| INO80C    | 413.7  | 295.3  | 0.03045 | 1.4  |
| CENTG2    | 1026.3 | 120.3  | 0.03078 | 8.53 |
| RGL4      | 151.9  | 307.5  | 0.03085 | 0.49 |
| C14ORF169 | 287.6  | 196.1  | 0.03128 | 1.47 |
| RUFY3     | 227.3  | 404.6  | 0.03144 | 0.56 |
| ASPM      | 476.5  | 272.6  | 0.03164 | 1.75 |
| ASAP2     | 179.4  | 276.8  | 0.03196 | 0.65 |
| PAM       | 664.1  | 351.4  | 0.03241 | 1.89 |
| GM2A      | 91.5   | 74.4   | 0.03254 | 1.23 |
| ICOSLG    | 135.3  | 102.6  | 0.03254 | 1.32 |
| VPREB3    | 2251.9 | 3767.9 | 0.03254 | 0.6  |
| C5ORF39   | 660.3  | 1174.8 | 0.03277 | 0.56 |
| CCDC102A  | 398.2  | 252.6  | 0.03277 | 1.58 |
| C3ORF21   | 270.5  | 194.6  | 0.03288 | 1.39 |
| EXT1      | 109.3  | 78.6   | 0.03300 | 1.39 |
| VRK1      | 526.8  | 369.1  | 0.03314 | 1.43 |
| ADRA2A    | 97.7   | 78.4   | 0.03320 | 1.25 |
| CABLES1   | 228.6  | 104.1  | 0.03387 | 2.2  |
| HMMR      | 412.5  | 210.9  | 0.03418 | 1.96 |
| LOC642299 | 270    | 171.5  | 0.03459 | 1.57 |
| VIL2      | 6882.2 | 4726.4 | 0.03543 | 1.46 |
| FASTKD2   | 136.3  | 103.6  | 0.03550 | 1.32 |
| GRK5      | 342.2  | 178.3  | 0.03560 | 1.92 |
| COPG2     | 197.2  | 142.4  | 0.03570 | 1.38 |
| SPRED2    | 159.6  | 80.6   | 0.03570 | 1.98 |
| BUB1      | 229.3  | 146.3  | 0.03573 | 1.57 |
| CENPQ     | 145.2  | 97.6   | 0.03596 | 1.49 |
| ZCCHC24   | 130    | 101.8  | 0.03635 | 1.28 |
| MAP2K1    | 1206.6 | 834.1  | 0.03654 | 1.45 |
| STK17B    | 869.5  | 1470.5 | 0.03658 | 0.59 |
| RPL39L    | 285.2  | 173.1  | 0.03679 | 1.65 |
| GPR146    | 99     | 77.9   | 0.03695 | 1.27 |
| MBLAC2    | 200.7  | 136.8  | 0.03700 | 1.47 |
| LOC283932 | 214.4  | 158.1  | 0.03722 | 1.36 |
| LOC642489 | 899    | 577.6  | 0.03733 | 1.56 |
| KDELR2    | 493.6  | 330.5  | 0.03783 | 1.49 |
| C1ORF69   | 145.5  | 111.9  | 0.03798 | 1.3  |
| TRIP6     | 392.8  | 596.9  | 0.03850 | 0.66 |
| C9ORF140  | 93.7   | 70.8   | 0.03872 | 1.32 |
| CDCA7L    | 280.6  | 444.4  | 0.03888 | 0.63 |
| GPD1L     | 579.1  | 408.8  | 0.03888 | 1.42 |
| PDIA5     | 250.3  | 150.3  | 0.03906 | 1.67 |
| DDEF2     | 225.7  | 350.2  | 0.03915 | 0.64 |
| LOC651621 | 92.2   | 144.3  | 0.03915 | 0.64 |
| PPAN      | 88.8   | 71.3   | 0.03915 | 1.24 |
| CHN2      | 185.7  | 413.9  | 0.03917 | 0.45 |



|              |        |        |         |      |
|--------------|--------|--------|---------|------|
| SNX4         | 485.5  | 347.4  | 0.03918 | 1.4  |
| UBE2Q1       | 409.7  | 293.4  | 0.03918 | 1.4  |
| RGS1         | 2710.4 | 732.5  | 0.03996 | 3.7  |
| LOC201175    | 124.3  | 250.5  | 0.04021 | 0.5  |
| OAS2         | 387.6  | 210.4  | 0.04030 | 1.84 |
| HLA-DRB6     | 1768   | 3276.3 | 0.04043 | 0.54 |
| SLC25A43     | 227.2  | 138.1  | 0.04060 | 1.64 |
| GLCE         | 136.7  | 83.7   | 0.04060 | 1.63 |
| FAR2         | 287.8  | 210    | 0.04065 | 1.37 |
| LMTK2        | 143.1  | 92.3   | 0.04117 | 1.55 |
| LOC100133609 | 201.9  | 152.2  | 0.04117 | 1.33 |
| NOV          | 231.3  | 97.2   | 0.04117 | 2.38 |
| SLC25A4      | 173.1  | 98.5   | 0.04156 | 1.76 |
| IFNGR1       | 702.2  | 491.9  | 0.04168 | 1.43 |
| PGRMC2       | 787.5  | 544.9  | 0.04168 | 1.45 |
| ATP8B4       | 150.4  | 100.8  | 0.04187 | 1.49 |
| FLI1         | 1641.7 | 1136.8 | 0.04202 | 1.44 |
| LOC100129960 | 109.8  | 85.9   | 0.04276 | 1.28 |
| EVI2B        | 718.5  | 1288.3 | 0.04286 | 0.56 |
| WDR40A       | 462.6  | 257    | 0.04312 | 1.8  |
| ARHGEF17     | 160    | 264.1  | 0.04331 | 0.61 |
| STX2         | 229    | 151.1  | 0.04331 | 1.52 |
| FEZ2         | 833.7  | 588.9  | 0.04346 | 1.42 |
| RYK          | 214.6  | 128.9  | 0.04346 | 1.66 |
| C9ORF119     | 285.1  | 419.4  | 0.04378 | 0.68 |
| TF           | 151    | 87.6   | 0.04402 | 1.72 |
| SLC12A2      | 280.3  | 201.7  | 0.04433 | 1.39 |
| CHCHD7       | 494.1  | 364    | 0.04440 | 1.36 |
| PDCL         | 153.2  | 116.2  | 0.04457 | 1.32 |
| LRRC56       | 118.6  | 161.3  | 0.04464 | 0.74 |
| PITPNA       | 140.5  | 105.9  | 0.04478 | 1.33 |
| LRMP         | 2285.9 | 3618.8 | 0.04479 | 0.63 |
| LDB2         | 553.7  | 193    | 0.04484 | 2.87 |
| NCF1         | 142.2  | 91.3   | 0.04484 | 1.56 |
| MAK16        | 628.6  | 448.7  | 0.04493 | 1.4  |
| TLR1         | 516.3  | 1069.9 | 0.04493 | 0.48 |
| LOC387934    | 445.8  | 320.5  | 0.04499 | 1.39 |
| MTFR1        | 104.8  | 77.8   | 0.04499 | 1.35 |
| CENPF        | 196.5  | 117.2  | 0.04520 | 1.68 |
| MARS2        | 153.4  | 107.1  | 0.04524 | 1.43 |
| LOC100133697 | 202    | 152    | 0.04548 | 1.33 |
| LOC286367    | 367.2  | 559.8  | 0.04548 | 0.66 |
| TSPAN33      | 684.4  | 1036.4 | 0.04548 | 0.66 |
| ELL2         | 311.4  | 180.1  | 0.04575 | 1.73 |
| TTC7A        | 102.6  | 136.4  | 0.04585 | 0.75 |
| LGMIN        | 271    | 595.5  | 0.04587 | 0.46 |
| SLC45A3      | 216.6  | 410.7  | 0.04603 | 0.53 |

|           |        |        |         |      |
|-----------|--------|--------|---------|------|
| ITGB2     | 3791.7 | 2190.4 | 0.04609 | 1.73 |
| TRIB1     | 526.5  | 355.8  | 0.04616 | 1.48 |
| LOC791120 | 839.9  | 1369.5 | 0.04619 | 0.61 |
| HS.551137 | 147.5  | 114.1  | 0.04625 | 1.29 |
| SLC6A16   | 124.1  | 90.8   | 0.04626 | 1.37 |
| SERPINI1  | 117.3  | 88.8   | 0.04678 | 1.32 |
| NEK2      | 217.8  | 135.3  | 0.04699 | 1.61 |
| MGC33556  | 2007.6 | 3154.8 | 0.04710 | 0.64 |
| CACNB3    | 437.8  | 652.7  | 0.04734 | 0.67 |
| FADD      | 263.6  | 191.4  | 0.04777 | 1.38 |
| HMGCS1    | 535.3  | 802.8  | 0.04777 | 0.67 |
| CEP72     | 140.5  | 110.1  | 0.04791 | 1.28 |
| ANGPT1    | 160.8  | 79.3   | 0.04865 | 2.03 |
| RARS      | 952.2  | 675.3  | 0.04874 | 1.41 |
| TEX10     | 337.1  | 247.4  | 0.04879 | 1.36 |
| CPT2      | 208.5  | 148.3  | 0.04910 | 1.41 |
| THOC3     | 186.5  | 131.7  | 0.04917 | 1.42 |
| ZNF318    | 544.4  | 315.7  | 0.04972 | 1.72 |
| HS2ST1    | 193.7  | 146.1  | 0.04977 | 1.33 |
| SDK2      | 502    | 825.2  | 0.04990 | 0.61 |

## DEFINITION

Homo sapiens ribosomal protein S4, Y-linked 1 (RPS4Y1), mRNA.

Homo sapiens solute carrier family 25, member 37 (SLC25A37), nuclear gene encoding mitochondrial protein, mRNA

PREDICTED: Homo sapiens similar to solute carrier family 25, member 37 (LOC653778), mRNA.

Homo sapiens tensin 3 (TNS3), mRNA.

PREDICTED: Homo sapiens similar to solute carrier family 25, member 37 (LOC654103), mRNA.

Homo sapiens inhibitor of DNA binding 3, dominant negative helix-loop-helix protein (ID3), mRNA.

Homo sapiens torsin family 1, member B (torsin B) (TOR1B), mRNA.

PREDICTED: Homo sapiens misc\_RNA (LOC729088), miscRNA.

Homo sapiens propionyl Coenzyme A carboxylase, alpha polypeptide (PCCA), nuclear gene encoding mitochondria

PREDICTED: Homo sapiens hypothetical protein MGC18216 (MGC18216), mRNA.

Homo sapiens IQ motif containing GTPase activating protein 2 (IQGAP2), mRNA.

Homo sapiens mex-3 homolog B (*C. elegans*) (MEX3B), mRNA.

Homo sapiens CD83 molecule (CD83), transcript variant 1, mRNA.

Homo sapiens nasal embryonic LHRH factor (NELF), mRNA.

Homo sapiens naked cuticle homolog 2 (*Drosophila*) (NKD2), mRNA.

Homo sapiens ATP-binding cassette, sub-family A (ABC1), member 1 (ABCA1), mRNA.

Homo sapiens RAS p21 protein activator 2 (RASA2), mRNA.

Homo sapiens leucine rich repeat containing 32 (LRRC32), mRNA.

Homo sapiens retinol dehydrogenase 10 (all-trans) (RDH10), mRNA.

Homo sapiens protein kinase, X-linked (PRKX), mRNA.

Homo sapiens SLAIN motif family, member 1 (SLAIN1), transcript variant 1, mRNA.

Homo sapiens RAB11 family interacting protein 5 (class I) (RAB11FIP5), mRNA.

Homo sapiens coiled-coil domain containing 24 (CCDC24), mRNA.

Homo sapiens phosphodiesterase 3B, cGMP-inhibited (PDE3B), mRNA.

Homo sapiens high-mobility group box 3 (HMGB3), mRNA.

Homo sapiens potassium channel, subfamily K, member 3 (KCNK3), mRNA.

Homo sapiens chromosome 6 open reading frame 192 (C6orf192), mRNA.

Homo sapiens ribonuclease, RNase A family, k6 (RNASE6), mRNA.

Homo sapiens CCAAT/enhancer binding protein (C/EBP), beta (CEBPB), mRNA.

Homo sapiens transmembrane protein 181 (TMEM181), mRNA.

Homo sapiens v-myc myelocytomatosis viral oncogene homolog (avian) (MYC), mRNA.

Homo sapiens pituitary tumor-transforming 1 interacting protein (PTTG1IP), mRNA.

Homo sapiens KLF-like MARVEL transmembrane domain containing 8 (CMTM8), mRNA.

PREDICTED: Homo sapiens family with sequence similarity 7, member A1, transcript variant 4 (FAM7A1), mRNA.

Homo sapiens transmembrane 9 superfamily member 3 (TM9SF3), mRNA.

Homo sapiens 1-acylglycerol-3-phosphate O-acyltransferase 5 (lysophosphatidic acid acyltransferase, epsilon) (AG

Homo sapiens CD99 molecule (CD99), transcript variant 1, mRNA.

Homo sapiens kinesin family member 20B (KIF20B), mRNA.

Homo sapiens inhibitor of DNA binding 1, dominant negative helix-loop-helix protein (ID1), transcript variant 2, ml

Homo sapiens RAS, dexamethasone-induced 1 (RASD1), mRNA.

Homo sapiens cDNA FLJ41846 fis, clone NT2RI3003162

Homo sapiens histone deacetylase 4 (HDAC4), mRNA.

Homo sapiens cDNA FLJ32550 fis, clone SPLEN1000056

Homo sapiens leucine rich repeat and fibronectin type III domain containing 3 (LRFN3), mRNA.

Homo sapiens myosin X (MYO10), mRNA.

Homo sapiens lipoma HMGIC fusion partner (LHFP), mRNA.

Homo sapiens chromosome 13 open reading frame 27 (C13orf27), mRNA.  
PREDICTED: Homo sapiens similar to Ornithine aminotransferase, mitochondrial precursor (Ornithine--oxo-acid an  
Homo sapiens ribosomal protein L23a pseudogene 53 (RPL23AP53), non-coding RNA.  
Homo sapiens nuclear factor of kappa light polypeptide gene enhancer in B-cells inhibitor, epsilon (NFKBIE), mRNA/  
Homo sapiens aurora kinase A (AURKA), transcript variant 5, mRNA.  
Homo sapiens cellular repressor of E1A-stimulated genes 1 (CREG1), mRNA.  
Homo sapiens ornithine aminotransferase (gyrate atrophy) (OAT), nuclear gene encoding mitochondrial protein, n  
Homo sapiens SET domain containing 6 (SETD6), mRNA.  
Homo sapiens signal-induced proliferation-associated 1 like 2 (SIPA1L2), mRNA.  
Homo sapiens chaperonin containing TCP1, subunit 5 (epsilon) (CCT5), mRNA.  
PREDICTED: Homo sapiens hypothetical protein LOC644128 (LOC644128), mRNA.  
Homo sapiens family with sequence similarity 108, member C1 (FAM108C1), mRNA.  
full-length cDNA clone CS0DF003YI18 of Fetal brain of Homo sapiens (human)  
Homo sapiens LanC lantibiotic synthetase component C-like 2 (bacterial) (LANCL2), mRNA.  
Homo sapiens Wolfram syndrome 1 (wolframin) (WFS1), mRNA.  
Homo sapiens motile sperm domain containing 1 (MOSPD1), mRNA.  
Homo sapiens inositol 1,4,5-triphosphate receptor interacting protein-like 2 (ITPRIPL2), mRNA.  
Homo sapiens uridine-cytidine kinase 2 (UCK2), mRNA.  
Homo sapiens laminin, gamma 1 (formerly LAMB2) (LAMC1), mRNA.  
Homo sapiens zinc finger E-box binding homeobox 2 (ZEB2), mRNA.  
Homo sapiens succinate-CoA ligase, ADP-forming, beta subunit (SUCLA2), mRNA.  
PREDICTED: Homo sapiens hypothetical protein LOC730256 (LOC730256), mRNA.  
Homo sapiens H1 histone family, member X (H1FX), mRNA.  
Homo sapiens chromosome 14 open reading frame 4 (C14orf4), mRNA.  
Homo sapiens EH domain binding protein 1 (EHBP1), mRNA.  
Homo sapiens chromosome 9 open reading frame 21 (C9orf21), mRNA.  
Homo sapiens amyloid beta (A4) precursor-like protein 2 (APLP2), mRNA.  
Homo sapiens antagonist of mitotic exit network 1 homolog (*S. cerevisiae*) (AMN1), mRNA.  
Homo sapiens cyclin J (CCNJ), mRNA.  
Homo sapiens peroxisomal proliferator-activated receptor A interacting complex 285 (PRIC285), transcript variant  
Homo sapiens jun oncogene (JUN), mRNA.  
Homo sapiens quiescin Q6 sulfhydryl oxidase 2 (QSOX2), mRNA.  
Homo sapiens Ctr9, Paf1/RNA polymerase II complex component, homolog (*S. cerevisiae*) (CTR9), mRNA.  
Homo sapiens interleukin 17 receptor A (IL17RA), mRNA.  
Homo sapiens Rho-related BTB domain containing 3 (RHOBTB3), mRNA.  
Homo sapiens 5'-nucleotidase, cytosolic III (NT5C3), transcript variant 1, mRNA.  
Homo sapiens family with sequence similarity 43, member A (FAM43A), mRNA.  
Homo sapiens calumenin (CALU), mRNA.  
Homo sapiens family with sequence similarity 64, member A (FAM64A), mRNA.  
Homo sapiens solute carrier family 1 (glial high affinity glutamate transporter), member 3 (SLC1A3), mRNA.  
PREDICTED: Homo sapiens hypothetical protein LOC100129668 (LOC100129668), mRNA.  
Homo sapiens bromodomain and WD repeat domain containing 3 (BRWD3), mRNA.  
Homo sapiens NOP16 nucleolar protein homolog (yeast) (NOP16), mRNA.  
Homo sapiens ependymin related protein 1 (zebrafish) (EPDR1), mRNA.  
Homo sapiens receptor-interacting serine-threonine kinase 2 (RIPK2), mRNA.  
Homo sapiens polymerase (RNA) III (DNA directed) polypeptide B (POLR3B), mRNA.  
PREDICTED: Homo sapiens similar to Jumonji, AT rich interactive domain 1B (RBP2-like) (LOC100133760), partial r

Homo sapiens opsin 3 (encephalopsin, panopsin) (OPN3), transcript variant 2, mRNA.

Homo sapiens ORM1-like 3 (*S. cerevisiae*) (ORMDL3), mRNA.

Homo sapiens microsomal glutathione S-transferase 3 (MGST3), mRNA.

Homo sapiens transducin (beta)-like 1X-linked (TBL1X), mRNA.

Homo sapiens WW domain binding protein 5 (WBP5), transcript variant 4, mRNA.

Homo sapiens chromosome 14 open reading frame 181 (C14orf181), mRNA.

Homo sapiens tubulin folding cofactor D (TBCD), mRNA.

Homo sapiens threonyl-tRNA synthetase 2, mitochondrial (putative) (TARS2), nuclear gene encoding mitochondria

Homo sapiens TYRO protein tyrosine kinase binding protein (TYROBP), transcript variant 1, mRNA.

Homo sapiens complement component 5 (C5), mRNA.

qw67g08.x1 NCI\_CGAP\_Ov33 Homo sapiens cDNA clone IMAGE:1996190 3, mRNA sequence

Homo sapiens Sec23 homolog B (*S. cerevisiae*) (SEC23B), transcript variant 2, mRNA.

Homo sapiens metallothionein 1F (MT1F), mRNA.

Homo sapiens X (inactive)-specific transcript (non-protein coding) (XIST), non-coding RNA.

Homo sapiens interleukin 3 receptor, alpha (low affinity) (IL3RA), mRNA.

Homo sapiens endothelial cell adhesion molecule (ESAM), mRNA.

Homo sapiens pim-2 oncogene (PIM2), mRNA.

Homo sapiens dyskeratosis congenita 1, dyskerin (DKC1), mRNA.

Homo sapiens hypothetical protein HSPC111 (HSPC111), mRNA.

AGENCOURT\_14354957 NIH\_MGC\_191 Homo sapiens cDNA clone IMAGE:30413554 5, mRNA sequence

Homo sapiens small nucleolar RNA, C/D box 56 (SNORD56), small nuclear RNA.

Homo sapiens zinc finger, CCHC domain containing 6 (ZCCHC6), mRNA.

Homo sapiens GTPase, IMAP family member 4 (GIMAP4), mRNA.

Homo sapiens prostaglandin E receptor 4 (subtype EP4) (PTGER4), mRNA.

Homo sapiens KIAA0427 (KIAA0427), mRNA.

Homo sapiens erythrocyte membrane protein band 4.1-like 2 (EPB41L2), mRNA.

Homo sapiens utrophin (UTRN), mRNA.

Homo sapiens carbohydrate (N-acetylglucosamine 6-O) sulfotransferase 7 (CHST7), mRNA.

Homo sapiens TAF5 RNA polymerase II, TATA box binding protein (TBP)-associated factor, 100kDa (TAF5), mRNA.

Homo sapiens WD repeat domain 49 (WDR49), mRNA.

Homo sapiens membrane-spanning 4-domains, subfamily A, member 6A (MS4A6A), transcript variant 2, mRNA.

Homo sapiens mediator complex subunit 11 (MED11), mRNA.

Homo sapiens nuclear factor of kappa light polypeptide gene enhancer in B-cells inhibitor, alpha (NFKBIA), mRNA.

PREDICTED: Homo sapiens similar to beta-tubulin cofactor D isoform 1 (LOC654260), mRNA.

Homo sapiens epithelial membrane protein 3 (EMP3), mRNA.

Homo sapiens DEAH (Asp-Glu-Ala-His) box polypeptide 33 (DHX33), mRNA.

Homo sapiens ras homolog gene family, member B (RHOB), mRNA.

Homo sapiens clone 23700 mRNA sequence

Homo sapiens lymphocyte antigen 6 complex, locus E (LY6E), mRNA.

Homo sapiens DEP domain containing 6 (DEPDC6), mRNA.

Homo sapiens heparin-binding EGF-like growth factor (HBEGF), mRNA.

Homo sapiens coiled-coil domain containing 99 (CCDC99), mRNA.

Homo sapiens metallothionein 1A (MT1A), mRNA.

Homo sapiens small nucleolar RNA, H/ACA box 61 (SNORA61), small nucleolar RNA.

Homo sapiens UDP-Gal:betaGlcNAc beta 1,4- galactosyltransferase, polypeptide 5 (B4GALT5), mRNA.

Homo sapiens RAB20, member RAS oncogene family (RAB20), mRNA.

Homo sapiens TSR1, 20S rRNA accumulation, homolog (*S. cerevisiae*) (TSR1), mRNA.

Homo sapiens plasminogen activator, urokinase (PLAU), mRNA.  
PREDICTED: Homo sapiens hypothetical protein LOC727820 (LOC727820), mRNA.  
PREDICTED: Homo sapiens misc\_RNA (C10orf50), miscRNA.  
Homo sapiens chromosome 5 open reading frame 33 (C5orf33), transcript variant 2, mRNA.  
PREDICTED: Homo sapiens similar to general transcription factor II, i isoform 1 (LOC652771), mRNA.  
Homo sapiens KIAA1279 (KIAA1279), mRNA.  
Homo sapiens metallothionein E (MTE), mRNA.  
Homo sapiens toll-like receptor adaptor molecule 1 (TICAM1), transcript variant 2, mRNA.  
Homo sapiens interleukin 10 receptor, alpha (IL10RA), mRNA.  
Homo sapiens FK506 binding protein 1A, 12kDa (FKBP1A), transcript variant 12B, mRNA.  
PREDICTED: Homo sapiens misc\_RNA (LOC729680), miscRNA.  
PREDICTED: Homo sapiens similar to high-mobility group box 3 (LOC646993), mRNA.  
Homo sapiens phosphoglucomutase 2 (PGM2), mRNA.  
PREDICTED: Homo sapiens misc\_RNA (LOC100128899), miscRNA.  
Homo sapiens dendrin (DDN), mRNA.  
Homo sapiens v-ets erythroblastosis virus E26 oncogene homolog 1 (avian) (ETS1), mRNA.  
Homo sapiens proline-rich coiled-coil 1 (PRRC1), mRNA.  
Homo sapiens ADP-ribosylation factor-like 9 (ARL9), mRNA.  
Homo sapiens hypothetical LOC100188949 (LOC100188949), non-coding RNA.  
Homo sapiens zinc fingers and homeoboxes 2 (ZHX2), mRNA.  
Homo sapiens EF-hand domain (C-terminal) containing 2 (EFHC2), mRNA.  
Homo sapiens transmembrane protein 2 (TMEM2), mRNA.  
Homo sapiens zinc finger protein 185 (LIM domain) (ZNF185), mRNA.  
Homo sapiens GTPase activating protein (SH3 domain) binding protein 1 (G3BP1), transcript variant 2, mRNA.  
Homo sapiens tryptophanyl tRNA synthetase 2, mitochondrial (WARS2), nuclear gene encoding mitochondrial pro  
Homo sapiens KN motif and ankyrin repeat domains 2 (KANK2), mRNA.  
Homo sapiens TRAF-interacting protein with forkhead-associated domain (TIFA), mRNA.  
Homo sapiens hexokinase 2 (HK2), mRNA.  
Homo sapiens tetratricopeptide repeat domain 39C (TTC39C), mRNA.  
Homo sapiens transcription factor 7-like 2 (T-cell specific, HMG-box) (TCF7L2), mRNA.  
Homo sapiens transforming growth factor, beta receptor III (TGFB3), mRNA.  
Homo sapiens phosphoribosylformylglycinamide synthase (FGAR amidotransferase) (PFAS), mRNA.  
Homo sapiens basic, immunoglobulin-like variable motif containing (BIVM), mRNA.  
PREDICTED: Homo sapiens similar to rctPI1, transcript variant 1 (LOC729708), mRNA.  
Homo sapiens cell division cycle 2, G1 to S and G2 to M (CDC2), transcript variant 1, mRNA.  
Homo sapiens chromosome 11 open reading frame 82 (C11orf82), mRNA.  
Homo sapiens BCL2/adenovirus E1B 19kDa interacting protein 3 (BNIP3), nuclear gene encoding mitochondrial pro  
Homo sapiens calcium homeostasis endoplasmic reticulum protein (CHERP), mRNA.  
Homo sapiens 5'-nucleotidase, ecto (CD73) (NT5E), mRNA.  
Homo sapiens syndecan binding protein (syntenin) (SDCBP), transcript variant 2, mRNA.  
Homo sapiens SEH1-like (*S. cerevisiae*) (SEH1L), transcript variant 1, mRNA.  
Homo sapiens cerebellin 3 precursor (CBLN3), mRNA.  
Homo sapiens trophoblast glycoprotein (TPBG), mRNA.  
Homo sapiens glucosaminyl (N-acetyl) transferase 1, core 2 (beta-1,6-N-acetylglucosaminyltransferase) (GCNT1), r  
Homo sapiens hepatoma-derived growth factor, related protein 3 (HDGFRP3), mRNA.  
Homo sapiens family with sequence similarity 65, member B (FAM65B), transcript variant 2, mRNA.  
Homo sapiens mitogen-activated protein kinase kinase 4 (MAP2K4), mRNA.

Homo sapiens DENN/MADD domain containing 3 (DENND3), mRNA.  
Homo sapiens IQ motif containing G (IQCG), mRNA.  
Homo sapiens dynein, light chain, LC8-type 2 (DYNLL2), mRNA.  
Homo sapiens nexilin (F actin binding protein) (NEXN), mRNA.  
Homo sapiens tRNA nucleotidyl transferase, CCA-adding, 1 (TRNT1), mRNA.  
Homo sapiens chromosome 18 open reading frame 19 (C18orf19), mRNA.  
Homo sapiens leptin receptor overlapping transcript-like 1 (LEPROTL1), mRNA.  
Homo sapiens growth arrest and DNA-damage-inducible, alpha (GADD45A), mRNA.  
Homo sapiens methylenetetrahydrofolate dehydrogenase (NADP+ dependent) 2-like (MTHFD2L), mRNA.  
Homo sapiens fucosidase, alpha-L- 1, tissue (FUCA1), mRNA.  
Homo sapiens transcription factor AP-4 (activating enhancer binding protein 4) (TFAP4), mRNA.  
Homo sapiens immunoglobulin J polypeptide, linker protein for immunoglobulin alpha and mu polypeptides (IGJ),  
Homo sapiens family with sequence similarity 44, member A (FAM44A), mRNA.  
Homo sapiens solute carrier family 39 (zinc transporter), member 14 (SLC39A14), mRNA.  
17000532611997 GRN\_EB Homo sapiens cDNA 5, mRNA sequence  
Homo sapiens mitogen-activated protein kinase kinase kinase 5 (MAP3K5), mRNA.  
Homo sapiens sirtuin (silent mating type information regulation 2 homolog) 1 (*S. cerevisiae*) (SIRT1), mRNA.  
Homo sapiens MOB1, Mps One Binder kinase activator-like 1A (yeast) (MOBK1A), mRNA.  
Homo sapiens cat eye syndrome chromosome region, candidate 6 (CECR6), mRNA.  
Homo sapiens acyl-CoA synthetase long-chain family member 1 (ACSL1), mRNA.  
Homo sapiens B-box and SPRY domain containing (BSPRY), mRNA.  
Homo sapiens cDNA FLJ13598 fis, clone PLACE1009921  
PREDICTED: Homo sapiens Kruppel-like factor 11 (KLF11), mRNA.  
Homo sapiens STAM binding protein-like 1 (STAMBPL1), mRNA.  
Homo sapiens family with sequence similarity 101, member B (FAM101B), mRNA.  
Homo sapiens nephronophthisis 4 (NPHP4), mRNA.  
Homo sapiens RNA (guanine-7-) methyltransferase (RNMT), mRNA.  
Homo sapiens immediate early response 3 interacting protein 1 (IER3IP1), mRNA.  
Homo sapiens asparagine-linked glycosylation 3 homolog (*S. cerevisiae*, alpha-1,3-mannosyltransferase) (ALG3), r  
Homo sapiens cDNA FLJ33115 fis, clone TRACH2001314  
Homo sapiens growth factor independent 1 transcription repressor (GFI1), mRNA.  
Homo sapiens zinc finger protein, multitype 1 (ZFPM1), mRNA.  
Homo sapiens killer cell lectin-like receptor subfamily F, member 1 (KLRF1), mRNA.  
Homo sapiens MIR155 host gene (non-protein coding) (MIR155HG), non-coding RNA.  
Homo sapiens general transcription factor IIIA (GTF3A), mRNA.  
Homo sapiens RANBP2-like and GRIP domain containing 2 (RGP2), mRNA. XM\_001134112 XM\_001134114 XM\_C  
Homo sapiens tumor necrosis factor (ligand) superfamily, member 13b (TNFSF13B), transcript variant 1, mRNA.  
Homo sapiens frequently rearranged in advanced T-cell lymphomas 2 (FRAT2), mRNA.  
Homo sapiens peroxiredoxin 3 (PRDX3), nuclear gene encoding mitochondrial protein, transcript variant 1, mRNA.  
Homo sapiens similar to LINE-1 reverse transcriptase homolog (LOC401623), mRNA.  
PREDICTED: Homo sapiens hypothetical protein BC006130 (LOC93622), misc RNA.  
Homo sapiens ELL associated factor 2 (EAF2), mRNA.  
Homo sapiens glycine dehydrogenase (decarboxylating) (GLDC), mRNA.  
PREDICTED: Homo sapiens RANBP2-like and GRIP domain containing 8 (RGP2), mRNA.  
Homo sapiens regulator of G-protein signaling 18 (RGS18), mRNA.  
Homo sapiens kinesin family member 11 (KIF11), mRNA.  
Homo sapiens synaptic vesicle glycoprotein 2A (SV2A), mRNA.

Homo sapiens immediate early response 5 (IER5), mRNA.

Homo sapiens radial spoke 3 homolog (Chlamydomonas) (RSPH3), mRNA.

Homo sapiens germinal center expressed transcript 2 (GCET2), transcript variant 1, mRNA.

Homo sapiens carbohydrate (N-acetylglucosamine-6-O) sulfotransferase 2 (CHST2), mRNA.

Homo sapiens dihydrolipoamide S-acetyltransferase (DLAT), mRNA.

Homo sapiens sushi domain containing 2 (SUSD2), mRNA.

Homo sapiens quinoid dihydropteridine reductase (QDPR), mRNA.

Homo sapiens hypothetical protein LOC90925 (LOC90925), mRNA.

Homo sapiens deoxyribonuclease II, lysosomal (DNASE2), mRNA.

Homo sapiens glutamate-cysteine ligase, modifier subunit (GCLM), mRNA.

Homo sapiens CUG triplet repeat, RNA binding protein 1 (CUGBP1), transcript variant 2, mRNA.

Homo sapiens delta-like 1 (Drosophila) (DLL1), mRNA.

Homo sapiens lipocalin 2 (LCN2), mRNA.

Homo sapiens zinc finger protein 792 (ZNF792), mRNA.

Homo sapiens coronin, actin binding protein, 1C (CORO1C), transcript variant 1, mRNA.

PREDICTED: Homo sapiens hypothetical protein LOC730525 (LOC730525), mRNA.

Homo sapiens OAF homolog (Drosophila) (OAF), mRNA.

Homo sapiens elastin microfibril interfacer 2 (EMILIN2), mRNA.

Homo sapiens ribonucleotide reductase M2 polypeptide (RRM2), mRNA.

PREDICTED: Homo sapiens similar to RIKEN cDNA 2310039H08 (LOC441150), mRNA.

Homo sapiens zinc finger protein 721 (ZNF721), mRNA.

Homo sapiens progesterone receptor membrane component 1 (PGRMC1), mRNA.

Homo sapiens teashirt zinc finger homeobox 1 (TSHZ1), mRNA.

Homo sapiens cytoplasmic linker associated protein 2 (CLASP2), mRNA.

Homo sapiens F-box protein 34 (FBXO34), mRNA.

Homo sapiens chromosome 19 open reading frame 42 (C19orf42), mRNA.

PREDICTED: Homo sapiens fatty acid binding protein 5-like 2 (FABP5L2), mRNA.

Homo sapiens CD93 molecule (CD93), mRNA.

Homo sapiens CD40 molecule, TNF receptor superfamily member 5 (CD40), transcript variant 1, mRNA.

Homo sapiens nuclear receptor co-repressor 1 (NCOR1), mRNA.

Homo sapiens mitochondrial ribosomal protein L19 (MRPL19), nuclear gene encoding mitochondrial protein, mRNA

PREDICTED: Homo sapiens similar to CHRNA7 (cholinergic receptor, nicotinic, alpha 7, exons 5-10) and FAM7A (far

Homo sapiens family with sequence similarity 100, member B (FAM100B), mRNA.

Homo sapiens ring finger protein 141 (RNF141), mRNA.

Homo sapiens carbonyl reductase 1 (CBR1), mRNA.

Homo sapiens CD27 molecule (CD27), mRNA.

Homo sapiens topoisomerase (DNA) II alpha 170kDa (TOP2A), mRNA.

Homo sapiens leucine rich repeat containing 58 (LRRC58), mRNA.

Homo sapiens membrane-spanning 4-domains, subfamily A, member 1 (MS4A1), transcript variant 1, mRNA.

Homo sapiens intercellular adhesion molecule 3 (ICAM3), mRNA.

Homo sapiens cDNA FLJ41455 fis, clone BRSTN2012284

Homo sapiens sperm associated antigen 5 (SPAG5), mRNA.

Homo sapiens apoptotic peptidase activating factor 1 (APAF1), transcript variant 1, mRNA.

Homo sapiens carcinoembryonic antigen-related cell adhesion molecule 6 (non-specific cross reacting antigen) (CE

Homo sapiens inhibitor of DNA binding 2, dominant negative helix-loop-helix protein (ID2), mRNA.

Homo sapiens chromosome 5 open reading frame 30 (C5orf30), mRNA.

Homo sapiens protein phosphatase 2C, magnesium-dependent, catalytic subunit (PPM2C), nuclear gene encoding



Homo sapiens leucine rich repeat containing 28 (LRRC28), mRNA.

Homo sapiens integrin, beta 7 (ITGB7), mRNA.

Homo sapiens phosphoribosyl pyrophosphate amidotransferase (PPAT), mRNA.

Homo sapiens interferon regulatory factor 1 (IRF1), mRNA.

PREDICTED: Homo sapiens hypothetical protein LOC650919 (LOC650919), mRNA.

Homo sapiens general transcription factor II, i, pseudogene 1 (GTF2IP1) on chromosome 7.

Homo sapiens nerve growth factor receptor (TNFRSF16) associated protein 1 (NGFRAP1), transcript variant 1, mRNA.

Homo sapiens dehydrogenase/reductase (SDR family) member 3 (DHRS3), mRNA.

Homo sapiens Abelson helper integration site 1 (AHI1), mRNA.

Homo sapiens membrane-associated ring finger (C3HC4) 3 (MARCH3), mRNA.

Homo sapiens ASF1 anti-silencing function 1 homolog B (*S. cerevisiae*) (ASF1B), mRNA.

Homo sapiens UBX domain protein 8 (UBXN8), mRNA.

Homo sapiens regulator of G-protein signalling 16 (RGS16), mRNA.

Homo sapiens N-myc downstream regulated gene 1 (NDRG1), mRNA.

Homo sapiens SRY (sex determining region Y)-box 8 (SOX8), mRNA.

Homo sapiens potassium channel, subfamily K, member 6 (KCNK6), mRNA.

Homo sapiens piggyBac transposable element derived 4 (PGBD4), mRNA.

Homo sapiens phosphatidylinositol glycan anchor biosynthesis, class M (PIGM), mRNA.

Homo sapiens pseudouridylate synthase 7 homolog (*S. cerevisiae*) (PUS7), mRNA.

PREDICTED: Homo sapiens hypothetical protein LOC100133077 (LOC100133077), mRNA.

Homo sapiens UDP-N-acetylglucosamine pyrophosphorylase 1 (UAP1), mRNA.

Homo sapiens pleiomorphic adenoma gene-like 1 (PLAGL1), transcript variant 4, mRNA.

Homo sapiens proline rich 7 (synaptic) (PRR7), mRNA.

Homo sapiens SMAD family member 7 (SMAD7), mRNA.

Homo sapiens caldesmon 1 (CALD1), transcript variant 3, mRNA.

Homo sapiens COMM domain containing 10 (COMM10), mRNA.

PREDICTED: Homo sapiens hypothetical protein LOC643985 (LOC643985), mRNA.

Homo sapiens caveolin 1, caveolae protein, 22kDa (CAV1), mRNA.

PREDICTED: Homo sapiens similar to H2A histone family, member X (LOC731314), mRNA.

Homo sapiens zinc finger and SCAN domain containing 5A (ZSCAN5A), mRNA.

Homo sapiens chromosome 6 open reading frame 203 (C6orf203), mRNA.

Homo sapiens BAH domain and coiled-coil containing 1 (BAHCC1), mRNA.

Homo sapiens golgi autoantigen, golgin subfamily a, 4 (GOLGA4), mRNA.

Homo sapiens PAP associated domain containing 5 (PAPD5), transcript variant 2, mRNA.

Homo sapiens zinc finger CCCH-type containing 18 (ZC3H18), mRNA.

Homo sapiens adiponectin receptor 2 (ADIPOR2), mRNA.

Homo sapiens general transcription factor IIH, polypeptide 2, 44kDa (GTF2H2), mRNA.

Homo sapiens forkhead box H1 (FOXH1), mRNA.

Homo sapiens RING1 and YY1 binding protein (RYBP), mRNA.

Homo sapiens serine palmitoyltransferase, long chain base subunit 2 (SPTLC2), mRNA.

Homo sapiens dual adaptor of phosphotyrosine and 3-phosphoinositides (DAPP1), mRNA.

Homo sapiens B-cell CLL/lymphoma 3 (BCL3), mRNA.

Homo sapiens p21/Cdc42/Rac1-activated kinase 1 (STE20 homolog, yeast) (PAK1), mRNA.

Homo sapiens colony stimulating factor 1 receptor, formerly McDonough feline sarcoma viral (v-fms) oncogene hc

Homo sapiens hypothetical protein (LOC387882), mRNA.

Homo sapiens metallothionein 2A (MT2A), mRNA.

Homo sapiens KIAA1430 (KIAA1430), mRNA.

Homo sapiens centromere protein E, 312kDa (CENPE), mRNA.

Homo sapiens INO80 complex subunit C (INO80C), transcript variant 2, mRNA.

Homo sapiens centaurin, gamma 2 (CENTG2), mRNA.

Homo sapiens ral guanine nucleotide dissociation stimulator-like 4 (RGL4), mRNA.

Homo sapiens chromosome 14 open reading frame 169 (C14orf169), mRNA.

Homo sapiens RUN and FYVE domain containing 3 (RUFY3), transcript variant 2, mRNA.

Homo sapiens asp (abnormal spindle) homolog, microcephaly associated (Drosophila) (ASPM), mRNA.

Homo sapiens ArfGAP with SH3 domain, ankyrin repeat and PH domain 2 (ASAP2), transcript variant 1, mRNA.

Homo sapiens peptidylglycine alpha-amidating monooxygenase (PAM), transcript variant 3, mRNA.

Homo sapiens GM2 ganglioside activator (GM2A), mRNA.

Homo sapiens inducible T-cell co-stimulator ligand (ICOSLG), mRNA.

Homo sapiens pre-B lymphocyte gene 3 (VPREB3), mRNA.

Homo sapiens chromosome 5 open reading frame 39 (C5orf39), mRNA.

Homo sapiens coiled-coil domain containing 102A (CCDC102A), mRNA.

Homo sapiens chromosome 3 open reading frame 21 (C3orf21), mRNA.

Homo sapiens exostoses (multiple) 1 (EXT1), mRNA.

Homo sapiens vaccinia related kinase 1 (VRK1), mRNA.

Homo sapiens adrenergic, alpha-2A-, receptor (ADRA2A), mRNA.

Homo sapiens Cdk5 and Abl enzyme substrate 1 (CABLES1), transcript variant 1, mRNA.

Homo sapiens hyaluronan-mediated motility receptor (RHAMM) (HMMR), transcript variant 2, mRNA.

PREDICTED: Homo sapiens hypothetical protein LOC642299 (LOC642299), mRNA.

Homo sapiens villin 2 (ezrin) (VIL2), mRNA.

Homo sapiens FAST kinase domains 2 (FASTKD2), mRNA.

Homo sapiens G protein-coupled receptor kinase 5 (GRK5), mRNA.

Homo sapiens coatmer protein complex, subunit gamma 2 (COPG2), mRNA.

Homo sapiens sprouty-related, EVH1 domain containing 2 (SPRED2), mRNA.

Homo sapiens BUB1 budding uninhibited by benzimidazoles 1 homolog (yeast) (BUB1), mRNA.

Homo sapiens centromere protein Q (CENPQ), mRNA.

Homo sapiens zinc finger, CCHC domain containing 24 (ZCCHC24), mRNA.

Homo sapiens mitogen-activated protein kinase kinase 1 (MAP2K1), mRNA.

Homo sapiens serine/threonine kinase 17b (STK17B), mRNA.

Homo sapiens ribosomal protein L39-like (RPL39L), mRNA.

Homo sapiens G protein-coupled receptor 146 (GPR146), mRNA.

Homo sapiens metallo-beta-lactamase domain containing 2 (MBLAC2), mRNA.

Homo sapiens hypothetical protein LOC283932 (LOC283932), mRNA.

PREDICTED: Homo sapiens similar to FK506-binding protein 1A (LOC642489), mRNA.

Homo sapiens KDEL (Lys-Asp-Glu-Leu) endoplasmic reticulum protein retention receptor 2 (KDEL2), transcript va

Homo sapiens chromosome 1 open reading frame 69 (C1orf69), mRNA.

Homo sapiens thyroid hormone receptor interactor 6 (TRIP6), mRNA.

Homo sapiens chromosome 9 open reading frame 140 (C9orf140), mRNA.

Homo sapiens cell division cycle associated 7-like (CDCA7L), mRNA.

Homo sapiens glycerol-3-phosphate dehydrogenase 1-like (GPD1L), mRNA.

Homo sapiens protein disulfide isomerase family A, member 5 (PDIA5), mRNA.

Homo sapiens development and differentiation enhancing factor 2 (DDEF2), mRNA.

PREDICTED: Homo sapiens similar to hydroxysteroid (17-beta) dehydrogenase 7 (LOC651621), mRNA.

Homo sapiens peter pan homolog (Drosophila) (PPAN), mRNA.

Homo sapiens chimerin (chimaerin) 2 (CHN2), transcript variant 2, mRNA.

Homo sapiens sorting nexin 4 (SNX4), mRNA.

Homo sapiens ubiquitin-conjugating enzyme E2Q (putative) 1 (UBE2Q1), mRNA.

Homo sapiens regulator of G-protein signaling 1 (RGS1), mRNA.

Homo sapiens hypothetical protein LOC201175 (LOC201175), mRNA.

Homo sapiens 2'-5'-oligoadenylate synthetase 2, 69/71kDa (OAS2), transcript variant 2, mRNA.

Homo sapiens major histocompatibility complex, class II, DR beta 6 (pseudogene) (HLA-DRB6), non-coding RNA.

Homo sapiens solute carrier family 25, member 43 (SLC25A43), mRNA.

Homo sapiens glucuronic acid epimerase (GLCE), mRNA.

Homo sapiens fatty acyl CoA reductase 2 (FAR2), mRNA.

Homo sapiens lemur tyrosine kinase 2 (LMTK2), mRNA.

PREDICTED: Homo sapiens similar to membrane-associated ring finger (C3HC4) 3 (LOC100133609), mRNA.

Homo sapiens nephroblastoma overexpressed gene (NOV), mRNA.

Homo sapiens solute carrier family 25 (mitochondrial carrier; adenine nucleotide translocator), member 4 (SLC25A4), mRNA.

Homo sapiens interferon gamma receptor 1 (IFNGR1), mRNA.

Homo sapiens progesterone receptor membrane component 2 (PGRMC2), mRNA.

Homo sapiens ATPase, class I, type 8B, member 4 (ATP8B4), mRNA.

Homo sapiens Friend leukemia virus integration 1 (FLI1), mRNA.

PREDICTED: Homo sapiens misc\_RNA (LOC100129960), miscRNA.

Homo sapiens ecotropic viral integration site 2B (EVI2B), mRNA.

Homo sapiens WD repeat domain 40A (WDR40A), mRNA.

Homo sapiens Rho guanine nucleotide exchange factor (GEF) 17 (ARHGEF17), mRNA.

Homo sapiens syntaxin 2 (STX2), transcript variant 2, mRNA.

Homo sapiens fasciculation and elongation protein zeta 2 (zygin II) (FEZ2), transcript variant 1, mRNA.

Homo sapiens RYK receptor-like tyrosine kinase (RYK), transcript variant 1, mRNA.

Homo sapiens chromosome 9 open reading frame 119 (C9orf119), mRNA.

Homo sapiens transferrin (TF), mRNA.

Homo sapiens solute carrier family 12 (sodium/potassium/chloride transporters), member 2 (SLC12A2), mRNA.

Homo sapiens coiled-coil-helix-coiled-coil-helix domain containing 7 (CHCHD7), transcript variant 5, mRNA.

Homo sapiens phosducin-like (PDCL), mRNA.

Homo sapiens leucine rich repeat containing 56 (LRRC56), mRNA.

Homo sapiens phosphatidylinositol transfer protein, alpha (PITPNA), mRNA.

Homo sapiens lymphoid-restricted membrane protein (LRMP), mRNA.

Homo sapiens LIM domain binding 2 (LDB2), mRNA.

Homo sapiens neutrophil cytosolic factor 1 (NCF1), mRNA.

Homo sapiens MAK16 homolog (*S. cerevisiae*) (MAK16), mRNA.

Homo sapiens toll-like receptor 1 (TLR1), mRNA.

PREDICTED: Homo sapiens similar to Fatty acid-binding protein, epidermal (E-FABP) (Psoriasis-associated fatty acid-binding protein 1) (LOC100133697), mRNA.

Homo sapiens mitochondrial fission regulator 1 (MTFR1), nuclear gene encoding mitochondrial protein, mRNA.

Homo sapiens centromere protein F, 350/400ka (mitosin) (CENPF), mRNA.

Homo sapiens methionyl-tRNA synthetase 2, mitochondrial (MARS2), nuclear gene encoding mitochondrial protein, mRNA.

PREDICTED: Homo sapiens similar to hCG2040254 (LOC100133697), mRNA.

Homo sapiens FP944 (LOC286367), non-coding RNA.

Homo sapiens tetraspanin 33 (TSPAN33), mRNA.

Homo sapiens elongation factor, RNA polymerase II, 2 (ELL2), mRNA.

Homo sapiens tetratricopeptide repeat domain 7A (TTC7A), mRNA.

Homo sapiens legumain (LGMN), transcript variant 2, mRNA.

Homo sapiens solute carrier family 45, member 3 (SLC45A3), mRNA.

Homo sapiens integrin, beta 2 (antigen CD18 (p95), lymphocyte function-associated antigen 1; macrophage antigen 1) (ITGAE), mRNA.

Homo sapiens tribbles homolog 1 (Drosophila) (TRIB1), mRNA.

Homo sapiens hypothetical LOC791120 (LOC791120), non-coding RNA.

BX115738 Soares melanocyte 2NbHM Homo sapiens cDNA clone IMAGp998D07589, mRNA sequence

Homo sapiens solute carrier family 6, member 16 (SLC6A16), mRNA.

Homo sapiens serpin peptidase inhibitor, clade I (neuroserpin), member 1 (SERPINI1), mRNA.

Homo sapiens NIMA (never in mitosis gene a)-related kinase 2 (NEK2), mRNA.

Homo sapiens hypothetical LOC339541 (MGC33556), mRNA.

Homo sapiens calcium channel, voltage-dependent, beta 3 subunit (CACNB3), mRNA.

Homo sapiens Fas (TNFRSF6)-associated via death domain (FADD), mRNA.

Homo sapiens 3-hydroxy-3-methylglutaryl-Coenzyme A synthase 1 (soluble) (HMGCS1), transcript variant 2, mRNA.

Homo sapiens centrosomal protein 72kDa (CEP72), mRNA.

Homo sapiens angiopoietin 1 (ANGPT1), mRNA.

Homo sapiens arginyl-tRNA synthetase (RARS), mRNA.

Homo sapiens testis expressed 10 (TEX10), mRNA.

Homo sapiens carnitine palmitoyltransferase II (CPT2), nuclear gene encoding mitochondrial protein, mRNA.

Homo sapiens THO complex 3 (THOC3), mRNA.

Homo sapiens zinc finger protein 318 (ZNF318), mRNA.

Homo sapiens heparan sulfate 2-O-sulfotransferase 1 (HS2ST1), mRNA.

Homo sapiens sidekick homolog 2 (chicken) (SDK2), mRNA.

NA.

il protein, transcript variant 1, mRNA.

PAT5), mRNA.

RNA.

ninotransferase) (LOC648399), mRNA.

1.

nRNA.

2, mRNA.

rRNA.

al protein, mRNA.

tein, transcript variant 2, mRNA.

otein, mRNA.

nRNA.



mRNA.

rRNA.

01134116

IA.

family with sequence similarity 7A, exons A-E) fusion (LOC727935), mRNA.

ACAM6), mRNA.

mitochondrial protein, mRNA.

VA.

omolog (CSF1R), mRNA.

riant 1, mRNA.

14), nuclear gene encoding mitochondrial protein, mRNA.

d-binding protein homolog) (PA-FABP) (LOC387934), mRNA.

n, mRNA.

en 1 (mac-1) beta subunit) (ITGB2), mRNA.

4.
